# Supplementary material for: Characterising Recycled Organic and Mineral Materials for Use as Filter Media in Biofiltration Systems
Source: Preprints.org preprint supplement (doi:10.20944/preprints201904.0036.v1), 2019-04-02
Supplement: Supplementary file 3 [file supplementary]

Archive with 2 entries (2 files):
- Supplementary Files for Publication_Water-456955/Water-456955_Attachment1-PBS CS-1510-18.pdf
- Supplementary Files for Publication_Water-456955/Water-456955-Attachment2-AppendixG_Seleting appropriate k and C values.pdf
